# Supplementary material
Source: PubMed Central journal article supplement (PMC3222821)
Supplement: emm-43-596-s001.pdf [file emm-43-596-s001.pdf]

## Supplementary Data

**Table S1.** Primers used for chemokine and growth factor analyses

| Primer               | Sequence                                                                   | Base pairs | Annealing temperature (°C) |
|----------------------|----------------------------------------------------------------------------|------------|----------------------------|
| CCR1                 | F : 5'-CATCTTGGCTTCCATGCCAGGCT-3'<br>R : 5'-CCTCCGTCACCTGCACAGCCAGGT-3'    | 380        | 62                         |
| CCR2                 | F : 5'-CCTCCTGACAATCGATAGATACCT-3'<br>R : 5'-GTCACCTGCGTGGCTTGGTCCAGT-3'   | 474        | 56                         |
| CCR7                 | F : 5'-ATCTCCAAGACCAGAGATAGTG-3'<br>R : 5'-AAATGTTGCTCTCTTAACGAAT-3'       | 461        | 62                         |
| CXCR4                | F : 5'-GAGGAGTTAGCCAAGATGTG-3'<br>R : 5'-TTCTTCTGGTAACCCATGAC-3'           | 489        | 62                         |
| CXCR5                | F : 5'-CATCCTAATCATCCAATGCT-3'<br>R : 5'-AGCTCTTTTCTTCCCTCTGT-3'           | 494        | 62                         |
| CXCR6                | F : 5'-CCTTAACCCTGTGCTCTATG-3'<br>R : 5'-CTCACCTCTTCAACCTTCAG-3'           | 517        | 62                         |
| EGF-R                | F : 5'-GCATCTGCCTCACCTCCACCGTGCA-3'<br>R : 5'-GATTCCGTCATATGGCTTGGATCCA-3' | 419        | 64                         |
| FGFR1                | F : 5'-CCTGACCACAGAATTGGAGGCTACA-3'<br>R : 5'-AGTTCATGTGTAAGGTGTACAGTG-3'  | 250        | 58                         |
| TGFBR2               | F : 5'-CCACGTGTGCCAACAACATCAACCA-3'<br>R : 5'-TGAAGAACGACCTAACCTGCTGCC-3'  | 498        | 58                         |
| TNFRSF1A<br>(CD120a) | F : 5'-GAGAGGCCATAGCTGTCTGG-3'<br>R : 5'-GTTCTTTGTGGCACTTGGT-3'            | 218        | 58                         |
| PDGFRA<br>(CD140a)   | F : 5'-GAAGCTGTCAACCTGCATGA-3'<br>R : 5'-CTTCTTTAGCACGGATCAGC-3'           | 187        | 58                         |
| PDGFRB<br>(CD140b)   | F : 5'-GCGGCTGGTGGAGCCGGTGA-3'<br>R : 5'-CTCACTTAGCTCCAGCACTCGGACA-3'      | 508        | 68                         |
| IGF1R<br>(CD221)     | F : 5'-GTGAACGAGGCCGCAAGCATGCGT-3'<br>R : 5'-CTGTGGACGAACTTATTGGCGTTGA-3'  | 299        | 58                         |
| c-Met                | F : 5'-CAGGCAGTGCAGCATGTAGT-3'<br>R : 5'-GATGATTCCCTCGGTCAGAA-3'           | 201        | 58                         |
| GAPDH                | F : 5'-AATCCCATCACCATCTTCCAG-3'<br>R : 5'-AGGGGCCATCCACAGTCTTCT-3'         | 362        | 55                         |
